# A connectivity-constrained computational account of topographic organization in primate high-level visual cortex

Nicholas M. Blauch<sup>a,b,†</sup>, Marlene Behrmann<sup>b,c,†</sup>, and David C. Plaut<sup>b,c,†</sup>

<sup>a</sup>Program in Neural Computation, Carnegie Mellon University; <sup>b</sup>Neuroscience Institute, Carnegie Mellon University; <sup>c</sup>Department of Psychology, Carnegie Mellon University

This manuscript was compiled on July 13, 2021

**Inferotemporal cortex (IT) in humans and other primates is topographically organized, containing multiple hierarchically-organized areas selective for particular domains, such as faces and scenes. This organization is commonly viewed in terms of evolved domain-specific visual mechanisms. Here, we develop an alternative, domain-general and developmental account of IT cortical organization. The account is instantiated as an Interactive Topographic Network (ITN), a form of computational model in which a hierarchy of model IT areas, subject to connectivity-based constraints, learns high-level visual representations optimized for multiple domains. We find that minimizing a wiring cost on spatially organized feedforward and lateral connections within IT, combined with constraining the feedforward processing to be strictly excitatory, results in a hierarchical, topographic organization. This organization replicates a number of key properties of primate IT cortex, including the presence of domain-selective spatial clusters preferentially involved in the representation of faces, objects, and scenes, columnar responses across separate excitatory and inhibitory units, and generic spatial organization whereby the response correlation of pairs of units falls off with their distance. We thus argue that domain-selectivity is an emergent property of a visual system optimized to maximize behavioral performance while minimizing wiring costs.**

Inferotemporal cortex | Functional organization | Topography | Neural network | Development

Inferotemporal cortex (IT) subserves higher-order visual abilities in primates, including the visual recognition of objects and faces. By adulthood in humans, IT cortex, and ventral temporal cortex more generally, contains substantial functional topographic organization, including the presence of domain-selective spatial clusters in reliable spatial locations, including clusters for faces (1–3), objects (4), buildings and scenes (5, 6), and words (7). Similar domain-level topographic properties have been found in rhesus macaque monkeys, including multiple regions of clustered face selectivity (8–10). Intriguingly, this selectivity is encompassed in a larger scale “mosaic” of category-selectivity, in which areas of category-selectivity themselves have further columnar clustering within them (11–13), pointing to more general principles of organization beyond the domain level. In line with this idea, human IT cortex also exhibits larger-scale organization for properties such as animacy and real-world size (14, 15), and midlevel features characteristic of these properties and domains have been shown to account well for patterns of high-level visual selectivity (16). How these domain-level and more general facets of functional organization arise, how they are related, and whether and in what ways they rely on innate specification and/or experience-based developmental processes remain contentious.

Recent work has demonstrated that the neural basis of face recognition depends crucially on experience, given that deprivation of face viewing in juvenile macaque monkeys prevents the emergence of face-selective regions (17). Relatedly, the absence of exposure to written forms through reading acquisition precludes the emergence of word-selective regions (18, 19). That there exists clustered neural response selectivity for evolutionarily new visual categories such as written words offers further evidence that the topographic development of the human visual system has a critical experience-dependent component (20, 21). In contrast with a system in which innate mechanisms are determined through natural selection, this experiential plasticity permits the tuning of the visual system based on the most frequent and important visual stimuli that are actually encountered, thereby enabling greater flexibility for ongoing adaptation across the lifespan.

There is considerable computational evidence that experience-dependent neural plasticity can account for the response properties of the visual system at the single neuron level. Classic work demonstrated that the statistics of natural images are sufficient for learning V1-like localized edge-tuning within a sparse coding framework (22, 23). More recently, deep convolutional neural networks (DCNNs) trained on image classification have been successful in accounting for the tuning of neurons in V1, V2, V4, and IT in a hierarchically consistent manner, where deeper layers of the DCNN map

## Significance Statement

We introduce the Interactive Topographic Network, a framework for modeling high-level vision, to demonstrate in computational simulations that the spatial clustering of domains in late stages of the primate visual system may arise from the demands of visual recognition under the constraints of minimal wiring costs and excitatory between-area neuronal communication. The learned organization of the model is highly specialized but not fully modular, capturing many of the properties of organization in primates. Our work is significant for cognitive neuroscience, by providing a domain-general developmental account of topographic functional specialization, and for computational neuroscience, by demonstrating how well-known biological details can be successfully incorporated into neural network models in order to account for critical empirical findings.

N.M.B., M.B., and D.C.P. conceived of the work. N.M.B. developed software and performed simulations and data analyses. M.B. and D.C.P. supervised the project. N.M.B. wrote the first draft of the paper. N.M.B., M.B., and D.C.P. revised the paper.

The authors declare no competing interests.

† To whom correspondence should be addressed. E-mail: {blauch,behrmann,plaut}@cmu.edu

51 onto later layers of the anatomical hierarchy (24, 25).

52 Above the single-neuron level, considerable prior work has  
53 demonstrated that topographic organization in V1 may emerge  
54 from self-organizing, input-driven mechanisms (26–32) (for  
55 review, see 33). For example, the pinwheel architecture of spa-  
56 tially repeating smooth orientation selectivity overlaid with  
57 global retinotopy has been shown to be well-accounted for  
58 by Self-Organizing Maps (SOMs) (29, 30, 34). One notable  
59 application of an SOM to modeling high-level visual cortex by  
60 Cowell and Cottrell (35) demonstrated stronger topographic  
61 clustering for faces compared to other object categories (e.g.,  
62 chairs, shoes), suggesting that the greater topographic cluster-  
63 ing of faces in IT is due to greater within-category similarity  
64 among faces compared to these other categories. This work  
65 provides a strong case for domain-general developmental prin-  
66 ciples underlying cortical topography in IT, but at least two  
67 important issues remain unaddressed. First, rather than only  
68 supporting discrimination of face from non-face categories (as  
69 in 35), face representations in humans (and likely non-human  
70 primates, though see (36)) must support the more difficult  
71 and fine-grained task of individuation; this task requires a  
72 “spreading transformation” of representations for different face  
73 identities (37, 38), which could alter the feature space  
74 and its topographic mapping, and necessitate a more domain-  
75 specialized representation than arises in an SOM. And secondly,  
76 rather than a single face-selective area, IT cortex actually con-  
77 tains multiple hierarchically-organized face-selective regions  
78 with preferential inter-connectivity (39). Generally, SOMs are  
79 not well equipped to explain such hierarchical topographic  
80 interactions, as they are designed to map a feature space into  
81 a topographic embedding, but not to transform the feature  
82 space hierarchically in the way needed to untangle invariant  
83 visual object representation from the statistics of natural im-  
84 ages (40). This suggests that SOMs may not be a good model  
85 of topographic development in cortical networks.

86 An alternative approach to studying topographic organi-  
87 zation involves incorporating distance-dependent constraints  
88 on neural computation within more general neural network  
89 models (41–44). Of particular interest is a hierarchical neural  
90 network developed by Jacobs and Jordan (43) in which error-  
91 driven learning was augmented with a spatial loss function  
92 penalizing large weights to a greater degree on longer versus  
93 shorter connections. This model was shown to develop to-  
94 pographic organization for ‘what’ versus ‘where’ information  
95 when trained with spatially segregated output units for the  
96 two tasks. Closely related work by Plaut and Behrmann (45)  
97 demonstrated that a similar spatially-constrained model with  
98 biased demands on input (e.g., retinotopy) and output (e.g.  
99 left-lateralized language) could account for the organization of  
100 domain-specific areas in IT cortex, such as the foveal bias for  
101 words and faces, leftward lateralization of words, and right-  
102 ward lateralization of faces (46–48). However, to date, none of  
103 these structurally-biased neural network models have been ap-  
104 plied to large-scale sets of naturalistic images, the statistics of  
105 which are thought to organize high-level visual representations  
106 in IT cortex (49), and the topography in these models (43, 45)  
107 has been analyzed at a relatively coarse level. Nonetheless,  
108 this early work raises the possibility that the application of  
109 distance-dependent constraints in a modern deep neural ar-  
110 chitecture trained on natural images might provide a more  
111 comprehensive account of topographic organization in IT.

112 Recently, Lee and colleagues (50) have modeled the topogra-  
113 phy of IT cortex with a deep neural network trained on a large  
114 set of natural images, using a correlation-based layout that  
115 explicitly encouraged units within a layer of the network to be  
116 spatially nearer to units with correlated responses, and farther  
117 from units with uncorrelated or anti-correlated responses. As  
118 a result, the network developed face-selective topography that  
119 corresponded well with data from macaque monkeys. However,  
120 this approach *imposes* topographic functional organization on  
121 the network based on measured functional responses, rather  
122 than *deriving* it from realistic principles of cortical structure  
123 and function, such as constraints on connectivity. Moreover,  
124 like the SOM, the approach can explain only *within-area* to-  
125 pographic organization, and not relationships between areas,  
126 such as multiple stages of IT cortex and their interactions with  
127 upstream and downstream cortical areas. Thus, the question  
128 remains whether such basic structural principles can account  
129 for the topographic organization of IT.

130 In the current work, we combined the approaches of task-  
131 optimized DCNN modeling (49, 50) with flexible connectivity-  
132 constrained architectures (43, 45) to develop a hierarchical  
133 model of topographic organization in IT cortex. We imple-  
134 mented a bias towards local connectivity through minimization  
135 of an explicit wiring cost function (43) alongside a task per-  
136 formance cost function. Intriguingly, we observed that this  
137 pressure on local connectivity was, on its own, insufficient  
138 to drive topographic organization in our model. This led us  
139 to explore two neurobiological constraints on the sign of  
140 connectivity—strictly excitatory feedforward connectivity, and  
141 the separation of excitation and inhibition—with the result  
142 that both, and particularly excitatory feedforward connectiv-  
143 ity, provided a powerful further inductive bias for developing  
144 topographic organization when combined with a bias towards  
145 local connectivity.

## 146 Results

147 **A connectivity-constrained model of ventral temporal cortex**  
148 **produces hierarchical, domain-selective response topogra-**  
149 **phy.** Our Interactive Topographic Network (ITN) framework  
150 for modeling high-level visual cortex consists of an *encoder*  
151 that approximates early visual cortex, followed by *interactive*  
152 *topography* areas that approximate IT cortex (Figure 1A; see  
153 Methods for details). We first present the results of simulations  
154 of a specific ITN model, in which a ResNet-50 encoder is pre-  
155 trained on a large dataset including several categories from the  
156 domains of objects, faces, and scenes (each domain matched in  
157 total training images). The trained encoder provides input to  
158 a 3-area IT with separate posterior (pIT), central (cIT), and  
159 anterior (aIT) areas. Each IT area consists of separate banks  
160 of excitatory (E) and inhibitory (I) units, and feedforward  
161 connectivity between areas is limited to the E units. After  
162 training, the model performed well on each domain, reaching  
163 a classification accuracy of 86.4% on the face domain, 81.8%  
164 on the object domain, and 65.9% on the scene domain (see  
165 Supplementary Figure S1). Performance differences across do-  
166 mains are unlikely to be an artifact of the specific architecture  
167 as they can be seen across a variety of CNNs, reflecting the  
168 intrinsic difficulty of each task given the variability within and  
169 between categories of each domain for the given image sets.

170 The trained model exhibits domain-level topographic orga-  
171 nization that is hierarchically linked across corresponding

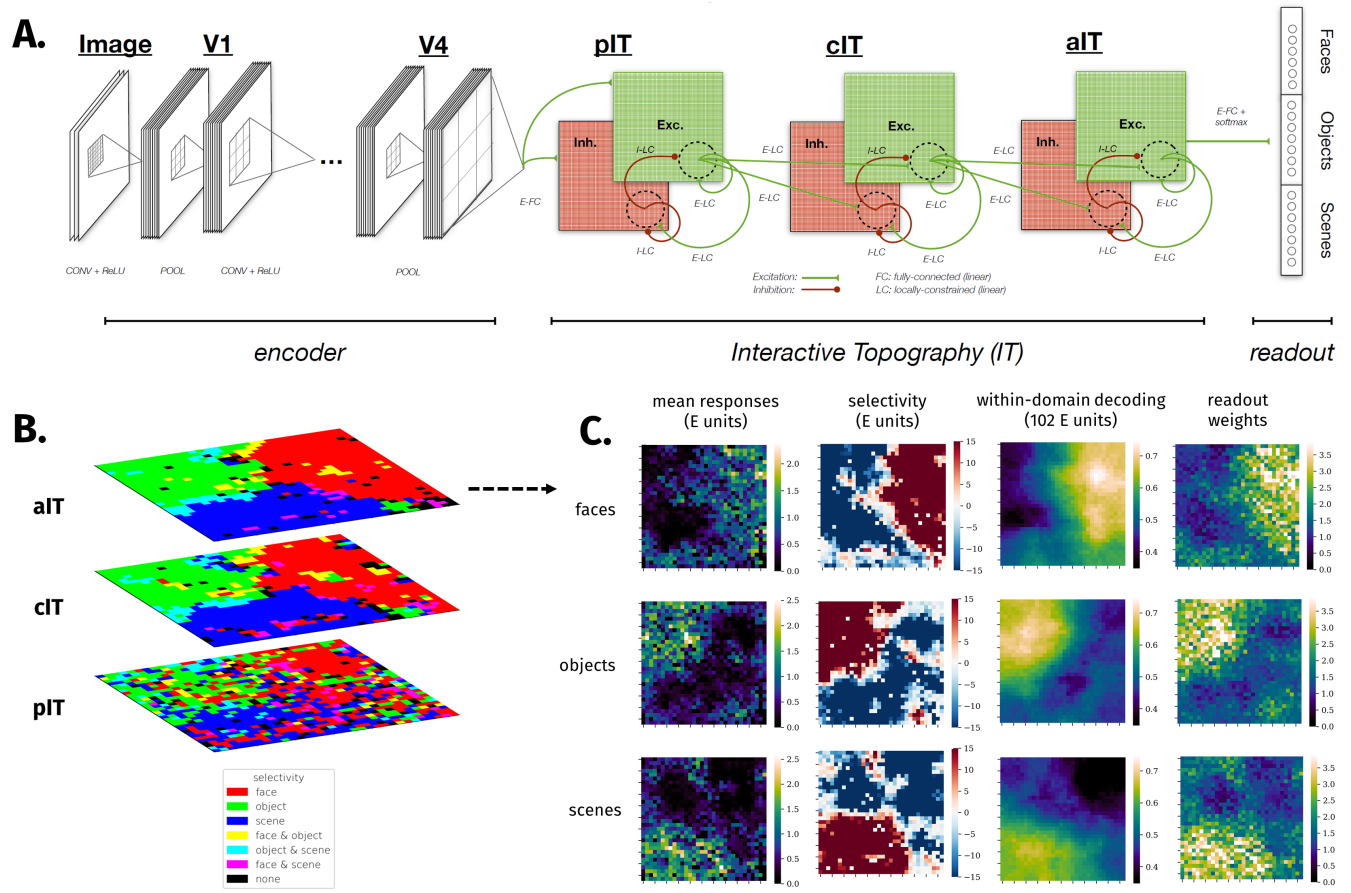

**Fig. 1.** The Interactive Topographic Network produces hierarchical domain-level organization. **A.** diagram of the Interactive Topographic Network (ITN). An ITN model consists of three components: an *encoder* that approximates early visual processing prior to inferotemporal cortex, the *interactive topography* (IT) areas that approximate inferotemporal cortex, and the *readout* mechanism for tasks such as object, scene, and face recognition. The architecture of each component is flexible. For example, a 4-layer simple convolutional network or a deep 50-layer ResNet can be used as the encoder; whereas the former facilitates end-to-end training along with a temporally-precise IT model, the latter supports better learning of the features that discriminate among trained categories. In this work, topographic organization is restricted to the IT layers. The figure depicts the main version of the ITN containing three constraints: a spatial connectivity cost pressuring local connectivity, separation of neurons with excitatory and inhibitory influences, and the restriction that all between-area connections are sent by the excitatory neurons. The final IT layer projects to the category readout layer containing one localist unit per learned category, here shown organized into three learned domains. (Note that this organization is merely visual and does not indicate any architectural segregation in the model. **B.** Domain selectivity at each level of the IT hierarchy. Selectivity is computed separately for each domain, and then binarized by including all units corresponding to  $p < 0.001$ . Each domain is assigned a color channel in order to plot all selectivities simultaneously. Note that a unit can have zero, one, or two selective domains, but not three, as indicated in the color legend. **C.** Detailed investigation of domain-level topography in aIT. Each heatmap plots a metric for each unit in aIT. The first column shows the mean domain response for each domain, the second column shows domain selectivity, the third column shows the within-domain searchlight decoding accuracy, and the fourth column shows the mean of weights of a given aIT unit into the readout categories of a given domain.

172 sectors of each layer (see Figure 1B). This result reflects the  
 173 fact that the distance-dependent constraints on feedforward  
 174 connectivity pressured units that have minimal between-area  
 175 distances to learn a similar tuning, which means that each  
 176 layer is roughly overlapping in their respective (separate) 2D  
 177 topography. The topographic organization gets somewhat  
 178 smoother moving from pIT to cIT, most likely because units  
 179 in cIT and aIT (but not pIT) have local feedforward receptive  
 180 fields and thus greater constraint on local cooperation.

181 We next scrutinized the topography in aIT, where there  
 182 are very smooth domain-level responses, and where we can di-  
 183 rectly compare responses with those of the recognition readout  
 184 mechanism. We computed mean domain responses, plotted  
 185 in the first column of Figure 1C, and domain selectivity, plot-  
 186 ted in the second column, which demonstrates corresponding  
 187 topographic organization. We confirmed the functional sig-  
 188 nificance of response topography by conducting a searchlight

189 analysis inspired by multivariate approaches to analyzing func-  
 190 tional magnetic resonance imaging (fMRI) data (51). We  
 191 used searchlights containing the 10% (102) nearest units. The  
 192 results of this analysis, shown in the third column of Figure  
 193 1C, revealed topographic organization of information for dis-  
 194 criminating between categories of each domain that is strongly  
 195 correlated with the domain selectivity maps for each domain  
 196 (all  $ps < 0.0001$ ).

197 To further confirm the functional significance of the topo-  
 198 graphic organization, we analyzed the spatial organization of  
 199 readout weights from aIT to the localist category readout layer.  
 200 We evaluated whether each domain placed more weight in read-  
 201 ing out from the units for which there was greater selectivity,  
 202 by calculating the mean domain response weight for each unit,  
 203 averaged over classes in each domain. This produced a map  
 204 for each domain, shown in the last column of Figure 1C. We  
 205 find a large positive correlation between the mean readout

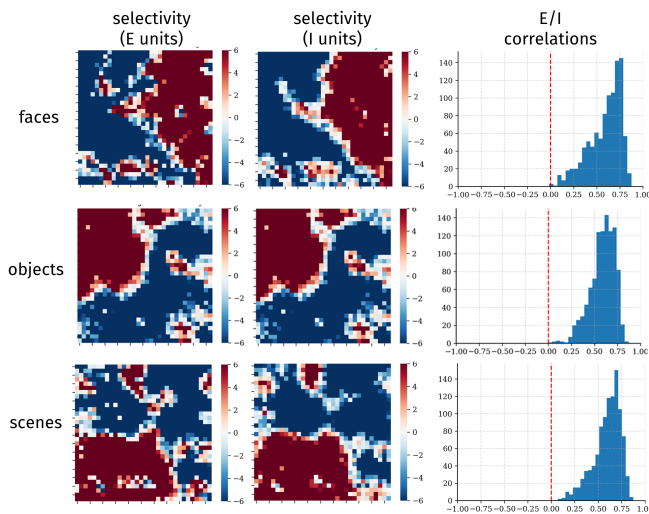

**Fig. 2.** E and I cells act as functional columns. Selectivity of cIT excitatory (E) units (left columns), and inhibitory (I) units (middle column) for each domain, and histograms of response correlations between co-localized E and I units for images from each domain (right column).

weight and the mean response for each domain (all  $r_s > 0.7$ , all  $p_s < 0.0001$ ), further demonstrating the functional significance of the response topography.

### Excitatory and inhibitory units operate as functional columns.

Thus far we have focused on the representations in the E cells, both for convenience and clarity, and because it is the E units that exclusively project to downstream areas (including the category readout units). We next assessed whether the I units show a similar topographic organization, and whether it is linked with the E cells. The selectivity for E and I cells is plotted and correlated in Figure 2. The I cells show similar domain-selective topography to the E cells. Moreover, the activities of E and I units in the same 2D location have highly correlated activities over each domain of images, as well as over all images. If we consider a pair of E and I neurons at a given location on the 2D sheet to correspond to a cortical column, our result is reminiscent of the finding that biological neurons in different layers at the same location on the 2D flattened cortex have similar response properties (52). In this way, E and I units in the model appear to act as functional columns.

### Effects of lesions indicate strong yet graded domain-level specialization.

We next performed a series of “lesion” analyses in the model in order to compare with neuropsychological data on face and object recognition (53–55). First, we performed focal lesions, as would be experienced by most patients with acquired brain damage. To simulate the impairment of patients with maximally specific deficits, we centered circular focal lesions of various sizes at the center of (smoothed) domain selectivity. Performance following each lesion was measured separately for each domain.

The results of this lesion analysis are shown in Figure 3A. Focal lesions centered on each domain for two representative lesion sizes—using 20% and 30% of the aIT units—are shown in Figure 3A. Focal lesions centered on each domain lead to an especially severe deficit in recognition for that domain, and

milder but significant deficits for the other domains as well. For a medium sized lesion of 20% of the units (Figure 3A, right), the deficit is significant for all domains (all  $p_s < 0.05$ ), and significantly stronger for recognition of the target domain (all  $p_s < 0.05$ ).

Are these more general effects of circumscribed lesions on non-preferred domains the result of imperfect (patchy) or non-circular topographic organization of an underlying modular organization? To answer this question, we performed selectivity-ordered lesions, in which units were sorted by their selectivity for a given domain, and selected according to their sorting index, shown in Figure 3B. The effects of damage in this case are similar to those for focal lesions, with greater damage to the domain on which sorting was performed, and smaller deficits to other domains for lesions targeting at least 20% of the units. Specifically, for 20% lesions, we found smaller but still significant deficits for both the preferred and non-preferred domains compared to focal lesions. This suggests that some but not all of the damage to the non-preferred domain induced by focal lesions may be due to imperfect or non-circular topographic functional organization. Importantly, these more distributed effects of lesions indicate that the functional organization, while highly specialized, is not strictly modular, at least with respect to one influential definition of modularity (56). Supplementary Figures S3, and S4 provide additional data on the nature of domain specialization in the network.

### Domain selectivity exists within a broader organization similar to that of primate IT cortex.

Previous empirical research has demonstrated that the response correlations between pairs of neurons fall off smoothly with increasing distance between the neurons (data from 57, as plotted in (50), Figure 4A.). This finding has been used to develop a class of topographic neural network models that explicitly fits the spatial layout of units to this relationship (50). We explored whether this relationship emerged naturally in our network due to its constrained connectivity, in line with the emergence of domain-selective topography. We thus computed the correlations among pairs of unit activations across images as a function of the distance between the units, focusing on aIT. As shown in Figure 4B, there is, indeed, a smooth decay of response correlations with distance, matching the qualitative trend in the empirical data (50, 57).

This result is not simply due to differences between domains, as it is also found when examining responses to images within each domain separately (shown for objects in Figure 4C). Along with previous results (50), our findings suggest that the domain-level topography may simply be a large-scale manifestation of a more general representational topography in which the information represented by neighboring units is more similar than that represented by more distal units. Importantly, our results go beyond previous ones to also demonstrate that this organization can arise under explicit wiring length and sign-based constraints on connectivity.

The generic distance-dependent functional relationship just discussed would suggest that functional organization may be exhibited at finer scales than the domain level. To assess this, we performed a clustering analysis on the readout weights from aIT. We adopted this approach due to the similarity between the readout weights and response topography in aIT (Figure 1C). A given category will achieve its maximal output

## A. Circular focal lesions

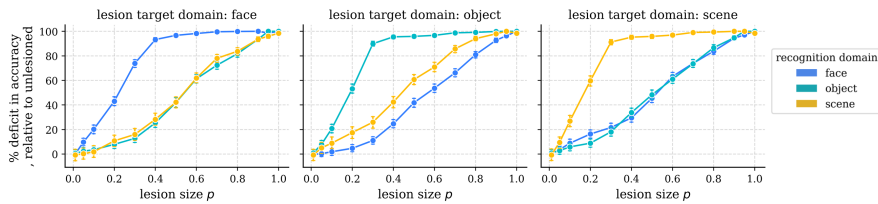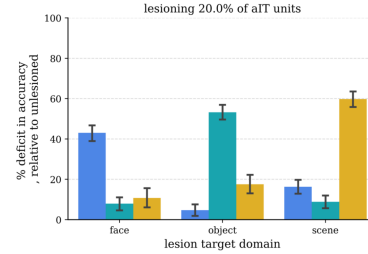

## B. Selectivity-ordered lesions

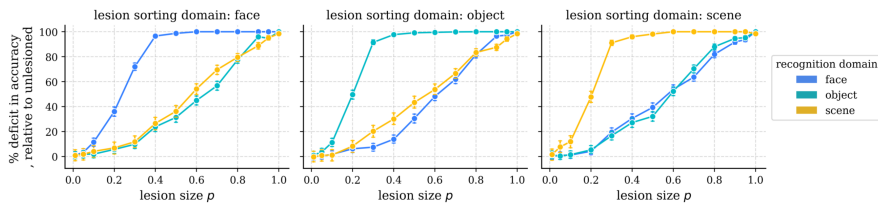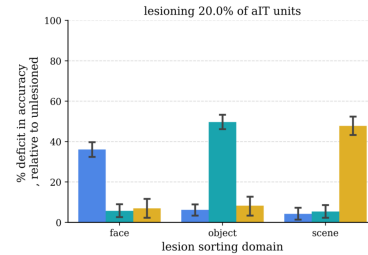

**Fig. 3.** Lesion results in the ITN model. Each plot shows the relative effects of a set of same-sized lesions on recognition performance for each domain, relative to the performance on the same domain in the undamaged model. Error bars show bootstrapped 95% confidence intervals over trials; thus, the statistical significance of a given lesion can be assessed by determining whether the confidence interval includes 0. **A.** Damage from circular focal lesions centered on the peak of smoothed selectivity for each domain. Left: results for a variety of lesion sizes. Right: a focused analysis of an intermediate lesion size of 20% of the aIT units. **B.** Damage from selectivity-ordered lesions for each domain. Left: results for a variety of lesion sizes. Right: a focused analysis of an intermediate lesion size of 20% of the aIT units.

303 response when the activation pattern in aIT most closely aligns  
 304 with the readout weights. Thus, the readout weights for a  
 305 given category act as a sort of category template to match  
 306 with representations in aIT. Clustering the readout weights  
 307 directly, rather than interpreting a set of activations to natural  
 308 images, enables clustering solutions to be explicitly linked to  
 309 each category. This allows for a concise clustering solution  
 310 containing one element for each category: the readout weights  
 311 projecting from aIT to the identity unit for that category. We  
 312 thus performed k-means clustering on the readout weights of  
 313 all categories separately for each domain using  $k = 3$  clus-  
 314 ters (Figure 4D), finding the centroids of these clusters, and  
 315 visualizing them in the 2D layout of aIT. The centroids and  
 316 cluster category members are shown in Figure 4E. The cluster  
 317 centroids show smooth topographic organization, with each  
 318 cluster having a primary hot-spot of weight, and graded weight  
 319 in other parts of aIT. Visual inspection of the cluster category  
 320 members suggests a striking organization for different classes  
 321 of object categories. This organization is confirmed through  
 322 cluster assignment quantification in Figure 4F. The first two  
 323 clusters represent the vast majority of animate categories,  
 324 with the first cluster representing mostly non-mammalian animate  
 325 categories such as birds and reptiles, and the second cluster  
 326 representing mostly dogs and other mammals such as bears  
 327 and raccoons. Last, the third cluster represents the vast ma-  
 328 jority of inanimate objects such as clocks and various tools.  
 329 Further analysis of the scene and face domain readout weights  
 330 indicated a similar within-domain organization, with scenes  
 331 being clustered by indoors-outdoors and natural-manmade  
 332 dimensions, and faces being clustered by gender and hair color  
 333 dimensions (Supplementary Figures S7, S8).

334 **Networks can reduce spatial costs and maintain performance**  
 335 **by increasing topographic organization.** The optimization  
 336 problem introduced by Jacobs and Jordan (43) and employed  
 337 in this work (Equation 4) explicitly works to both maximize

visual recognition performance through a task-based loss term  
 $\mathcal{L}_t$ , and to minimize overall wiring cost through a connection-  
 based lost term  $\mathcal{L}_w$  that scales with the square of connection  
 distance. To what extent does minimizing this wiring cost term  
 compromise performance? To answer this question, we tested  
 multiple ITN models with varying wiring cost penalties  $\lambda_w$   
 and measured the resulting wiring cost and task performance.  
 We computed wiring cost in two ways. The first way is by  
 using the  $\mathcal{L}_w$  term, which takes into account both the length  
 and strength of connections. The second way is inspired by  
 the wiring cost minimization framework (58), which cares only  
 about the presence—rather than the strength—of connections,  
 along with their distance. To compute this wiring cost  $\mathcal{L}_{w,u}$ ,  
 we sparsified the network to contain only the 1% strongest  
 connections (sparsity=0.99), and took the averaged squared  
 distance of remaining connections (59, see Equation 6); this  
 sparsification introduces minimal performance deficits in the  
 main ITN model (and Figure 5A). The results, shown in Figure  
 5A., demonstrate that increasing the wiring cost penalty  $\lambda_w$   
 by an order of magnitude decreased the first spatial cost  $\mathcal{L}_w$   
 by roughly an order of magnitude. Precisely, the log-log plot in  
 Figure 5A (left) revealed a power law relationship of the form  
 $y = Ax^m$ , where  $m = -1.24$  ( $p < 0.001$ ). The unweighted  
 wiring cost  $L_{w,u}$  similarly decays roughly linearly on the log-log  
 plot up to  $\lambda_w = 0.1$ , after which  $L_{w,u}$  saturates and then rises  
 for increasing values of  $\lambda_w$ . Thus, an intermediate value of  $\lambda_w$   
 appears sufficient to drive the network towards preferentially  
 local connectivity, and further increasing  $\lambda_w$  may minimize  
 further the optimization term  $\mathcal{L}_w$  through other means, such  
 as by further shrinking small long-range weights and reducing  
 participation at the grid boundaries where mean connection  
 lengths are longest (see Figure 5C, top right). In contrast  
 to the wiring costs, the final classification performance was  
 only marginally affected by  $\lambda_w$  (log-log slope  $m = -0.0016$ ,  
 $p < 0.001$ , explained variance  $r^2 = 0.582$ ; fit was not sig-

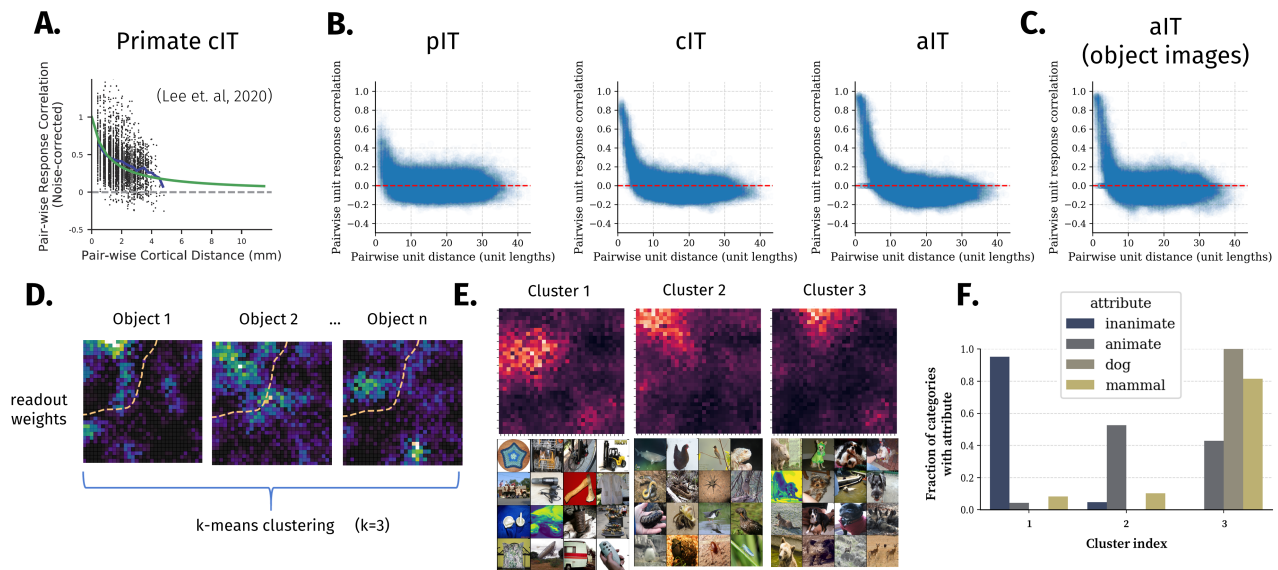

**Fig. 4.** Generic topographic organization beyond domain-selectivity emerges through task optimization under biologically-plausible constraints on connectivity. **A.** Distance-dependent response correlation in macaque IT (reproduced from 50, per CC-BY-NC-ND license). **B.** Distance-dependent response correlation in the excitatory cells of each layer, using images from all three domains (objects, faces, scenes). **C.** Distance-dependent response correlation in aIT using images from the object domain only, highlighting within-domain generic functional organization. **D.** Schematic for within-domain readout weight clustering analysis. The readout weights for each category of a given domain (i.e. objects) are subject to a k-means clustering analysis.  $k = 3$  clusters are used to identify dominant patterns of variation across categories in the information read-out by downstream localist category units. The output of the analysis is a cluster centroid and set of cluster category members for each of  $k$  clusters. **E.** Results of the within-domain readout weight clustering analysis. Top row: cluster centroids; bottom row: sample of 16 cluster category members; the dashed box at top-right re-plots the aIT domain-level selectivity for comparison with the object within-domain topography. **F.** Attribute quantification of category membership in the readout weight cluster analysis. For each cluster and attribute, the fraction of total categories with the attribute that are present in the cluster is plotted.

373 nificantly better than log-linear regression,  $m = -0.0028$ ,  
 374  $p < 0.001$ , explained variance  $r^2 = 0.583$ ) and the final top5  
 375 classification performance was unaffected by  $\lambda_w$  ( $p > .1$ ; see  
 376 Figure 5B). Last, increasing the wiring cost penalty gradually  
 377 resulted in the emergence of domain-selective areas, along  
 378 with distance-dependent pairwise response correlations (see  
 379 Figure 5C). Thus, models with a large wiring cost penalty  
 380 perform similarly to models with unconstrained connectivity  
 381 but achieve very small wiring cost, through the development  
 382 of topographic functional organization.

383 **Sign-based constraints are necessary for the development of**  
 384 **topography.** Having established that the main ITN architec-  
 385 ture produces a variety of interesting and empirically grounded  
 386 topographic organizational phenomena, we next performed a  
 387 constraint-removal analysis to determine which constraints—in  
 388 addition to the bias towards local connectivity—are necessary  
 389 for the development of topographic organization. We varied  
 390 three constraints: whether between-area feedforward connec-  
 391 tions were excitatory only, whether the model employed separ-  
 392 ate E and I unit populations within each area, and whether  
 393 the model contained lateral (recurrent) connections within  
 394 each area. We thus constructed four simplified models, compar-  
 395 ing both domain-selective and generic topography with the  
 396 full model used in earlier analyses.

397 The first reduced model, shown in the second column of  
 398 Figure 6A, contained a bias towards local connectivity and  
 399 recurrent connections but no sign constraints. This model  
 400 did not develop domain-level topography, and yielded a very  
 401 weak relationship of pairwise unit response correlation with  
 402 distance. This indicates that the sign-based constraints were  
 403 important for the development of topography in the main

404 model. We next examined a model without the restriction  
 405 that feedforward connections be limited to the excitatory neu-  
 406 rons, but with separate neurons responsible for excitatory and  
 407 inhibitory influences. Results for this model (Figure 6A, 3rd  
 408 column) indicate that the E/I separation increased topography  
 409 compared to the model without sign-based constraints. This  
 410 model yielded a strong generic topographic organization, but  
 411 a weaker domain-level topographic organization than the full  
 412 model. We next examined a model without separate neurons  
 413 for excitation and inhibition, but with the restriction that feed-  
 414 forward connections be excitatory. This model yielded strong  
 415 domain-level and generic topographic organization. Lastly, we  
 416 constructed a simple feedforward model in which we removed  
 417 learned lateral connectivity, leaving only layer normalization  
 418 to mediate within-area interactions. Like the previous model,  
 419 this model yielded strong topographic organization both at  
 420 the domain- and generic-levels.

421 We next compared each of these model variants in their  
 422 accuracy and spatial costs. First, we found that the accuracy  
 423 of the recurrent models was very similar, with a very small  
 424 ( $<1\%$  point) advantage for models in which feedforward con-  
 425 nectivity was not constrained to be excitatory. In contrast,  
 426 accuracy for the feedforward model was reduced more sub-  
 427 stantially ( $>4\%$  points), pointing to a performance benefit  
 428 of the recurrent connections. Moreover, we found that, for  
 429 the same  $\lambda_w$  across variants, the variants that developed clear  
 430 domain-level organization had the smallest wiring cost (Figure  
 431 6B, 2nd panel). The variant without sign-based constraints—  
 432 that demonstrated the least emergent topography—also had  
 433 the highest wiring cost, and this was due to increases in feed-  
 434 forward spatial costs (Figure 6B, 3rd panel). This can be  
 435 understood in terms of this model requiring more weight over

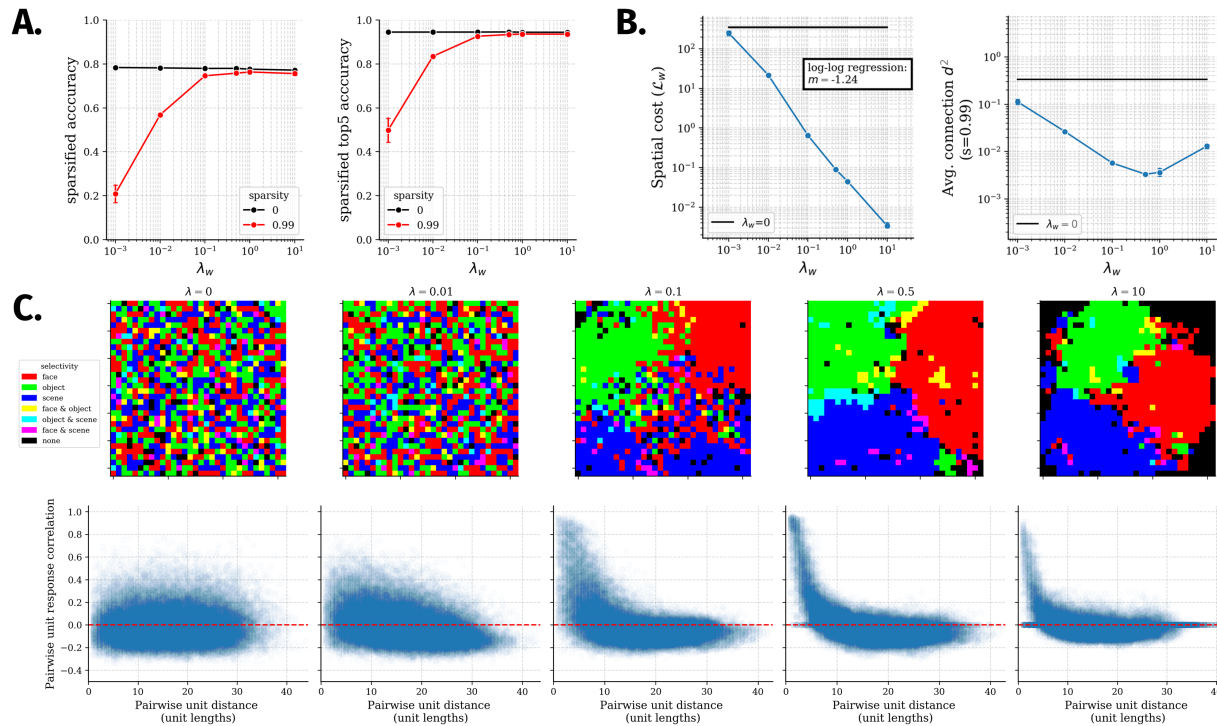

**Fig. 5.** Spatial cost, visual performance, and emergent topography as a function of spatial wiring penalty  $\lambda_w$ . Figures in **A-B** use 4 randomly initialized model instances per regularization strength. Error bars around markers show 95% confidence intervals for the plotted metric at a given spatial regularization strength, and black bands show 95% confidence intervals of the metric for a matched model without a spatial wiring penalty ( $\lambda_w = 0$ ). **A.** Accuracy analysis. Left: mean top1 accuracy on validation images from all domains versus versus spatial wiring penalty  $\lambda_w$  on a log X-axis and linear Y-axis. Right: mean top5 accuracy plotted in the same manner. In both cases, results for the main model as well as a sparsified version of the model (fraction of  $s = 0.99$  smallest within-IT weights set to 0) are plotted. **B.** Wiring cost analysis. Left: weighted spatial cost ( $\mathcal{L}_w$ ) versus spatial wiring penalty  $\lambda_w$ , plotted on log-X and log-Y axes. Right: unweighted spatial cost following sparsification versus spatial wiring penalty  $\lambda_w$ , plotted on log-X and log-Y axes. **C.** Emergent topographic organization in one model instance of each spatial wiring penalty  $\lambda_w$ . Top row: domain-selective aIT topography. Bottom row: generic aIT topography.

436 longer range connections due to the less ordered topography.  
 437 Lastly, in addition to reduced performance, the feedforward  
 438 variant yielded higher between-area spatial costs than the other  
 439 topographically organized variants; these between-area spatial  
 440 costs may be substantially more biologically burdensome than  
 441 within-area spatial costs, since they incorporate between-area  
 442 distances in addition to aligned point-to-point distances. For  
 443 simplicity, and because modeling the complexities of cortical  
 444 between- versus within-area distances was beyond the scope  
 445 of this work, feedforward spatial costs in these models only  
 446 include the aligned point-to-point distances. However, our  
 447 results suggest that the feedforward model would have a diffi-  
 448 cult time reducing such costs, whereas the recurrent variants  
 449 are able to minimize feedforward spatial costs through less  
 450 expensive lateral connections.

451 Finally, we assessed the domain-specificity of the final two  
 452 variants through the selectivity-ordered lesion approach used  
 453 earlier (Figure 3). The results for face-selectivity-ordered le-  
 454 sions, shown in Figure 6C, indicate that the networks exhibit  
 455 strong but graded specialization as in the main model, with  
 456 somewhat weaker deficits at the small lesion size of 0.2 indi-  
 457 cating somewhat stronger specialization. However, the rising  
 458 deficits for all domains when lesion size is increased from 0.2  
 459 to 0.3, and from 0.3 to 0.4, strongly suggest that there is a  
 460 partial graded overlap in the representation of domains, rather  
 461 than a truly modular representation.

## Discussion

462 Is IT cortex a collection of independent, possibly hard-wired  
 463 domain-specific modules, or a more general-purpose, interac-  
 464 tive, and plastic system? The investigations presented here  
 465 demonstrate that many of the key findings thought to support  
 466 a modular view of separable, innately-specified mechanisms for  
 467 the recognition of different high-level domains (faces, objects,  
 468 scenes) can be accounted for within a learning-based account  
 469 operating under generic connectivity constraints (also see 21).  
 470 By simulating a biologically plausible Interactive Topographic  
 471 Network (ITN) model of IT without domain-specific innate  
 472 structure, we found that we can “let the structure emerge”  
 473 (60, 61). Specifically, we observed that the model developed  
 474 strongly domain-selective spatial clusters which contain prefer-  
 475 ential information for each domain, and which, when lesioned,  
 476 produced largely (but not purely) specific deficits.  
 477

478 Beyond domain-level spatially clustered organization, the  
 479 model exhibited a more generic form of topographic organi-  
 480 zation, whereby nearby units had more correlated responses  
 481 over images compared to more distant units, a relationship  
 482 which has been demonstrated in macaque IT cortex (50, 57).  
 483 In combination with other modeling work (50) that pressured  
 484 neurons to obey this relationship as a proxy “wiring” loss  
 485 to develop face-selective topography, our work suggests that  
 486 this generic spatial functional relationship appears to both  
 487 underly domain-level organization and emerge from wiring  
 488 cost minimization.

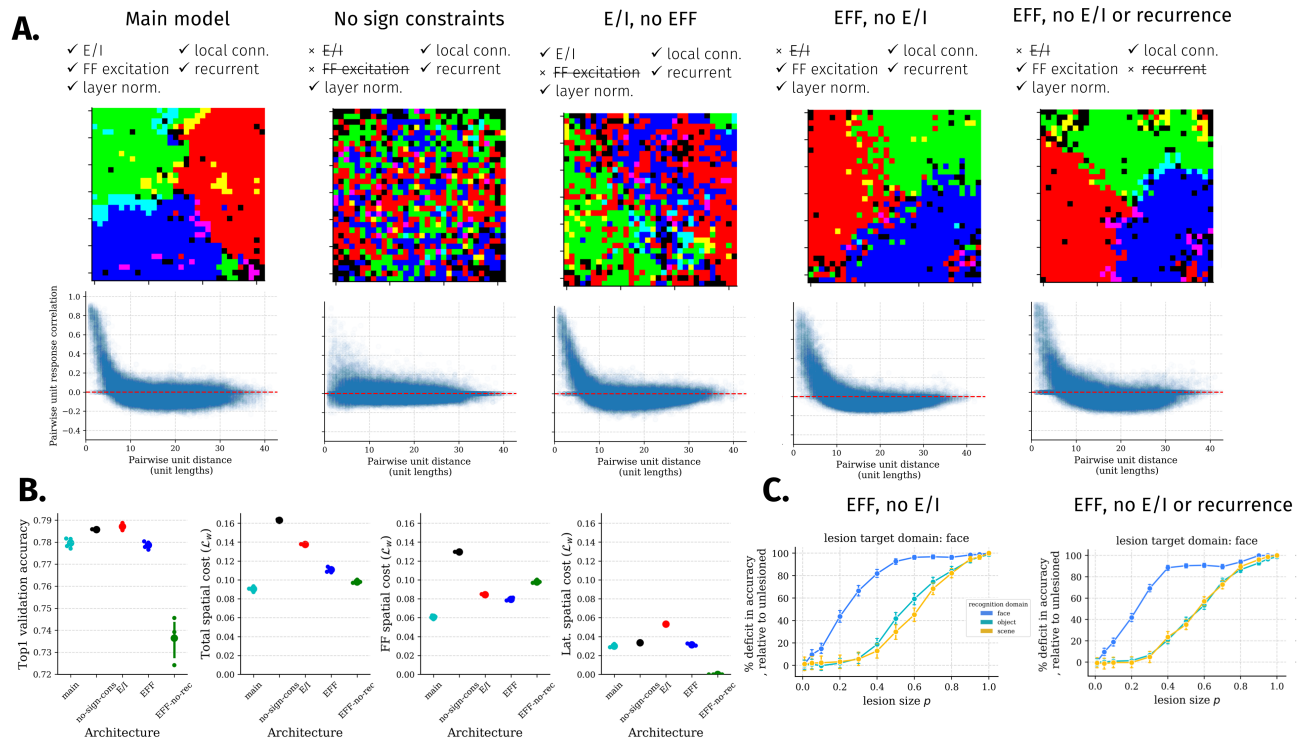

**Fig. 6.** Constraint removal analyses. **A.** Domain-level and generic topography in layer aIT across models with different constraints implemented. From left to right: "main model" is the full model with separate excitation and inhibition, excitatory feedforward connections, learned recurrent connectivity, and a bias towards local connectivity; "no sign constraints" removes both sign-based constraints; "E/I, no EFF" has separate excitation and inhibition but both cell types send feedforward connections to the next layer; "EFF, no E/I" does not separate excitation and inhibition (one map of units), but feedforward connections are restricted to be excitatory; "EFF, no E/I or recurrence" does not separate excitation and inhibition, does limit feedforward connections to be excitatory, and does not have recurrent connections besides the layer normalization also implemented in all of the other models. **B.** Comparing performance and spatial cost of the main model with the variants shown in A. Left: final classification accuracy of 4 randomly initialized versions of each architecture. Second: final spatial cost. Third: final feedforward spatial cost, computed as the spatial cost of all between-area (feedforward) connections. Right: final lateral spatial cost, computed as the spatial cost of all within-area (lateral) connections. **C.** Domain-level functional specialization of a single model of each variant measured using face selectivity-ordered lesions. More complete results for these two models can be found in Supplementary Figures S5 and S6.

489 Importantly, wiring cost and task optimization (i.e., object, 500  
 490 face, and scene image recognition), by themselves, were not 501  
 491 sufficient to produce topographic organization: we found that 502  
 492 two well-known biological details—excitatory-only between- 503  
 493 area communication, and separate excitatory and inhibitory 504  
 494 neural populations—could induce topographic organization in 505  
 495 the context of wiring cost and task optimization. In particular, 506  
 496 locally-biased excitatory feedforward connectivity provides an 507  
 497 inductive bias that neighboring units should have positively 508  
 498 correlated response properties, without specifying how corre- 509  
 499 lated they should be. Since the network is constrained to 510  
 500 perform multiple tasks, all units cannot be positively correlated 511  
 501 to reach high performance; the network thus is encouraged 512  
 502 to learn in a fashion whereby local units learn correlated 513  
 503 representations and more distant units learn uncorrelated or 514  
 504 anti-correlated representations, a hallmark of topographic 515  
 505 organization (50). Additionally, the separation of excitation and 516  
 506 inhibition contributed to topographic organization, but less 517  
 507 so than the excitatory restriction on feedforward connectiv- 518  
 508 ity. We reason that the separation of excitation and inhibition 519  
 509 serves to enhance topographic organization by inducing greater 520  
 510 pressure on the lateral connections, since learned inhibitory 521  
 511 responses must be mediated through lateral connections to 522  
 512 and from the I cells. As this connectivity is biased to be local, 523  
 513 it creates a pressure for local communication to be functionally

514 smooth so that neurons representing related information can 515  
 516 communicate with each other. While sign-based constraints 517  
 518 played an important role in the development of topographic 519  
 520 organization in this work, future work examining other tasks 521  
 522 (62, 63) and architectures (64, 65) that place greater demands 523  
 524 on lateral connectivity may find that local connectivity con- 525  
 526 straints suffice. 527

528 Our constraint-removal analysis allowed us to discover a 529  
 530 simple model capable of producing many of the hallmarks of 531  
 532 topographic organization in the main model. This feedforward 533  
 534 variant contained local excitatory feedforward connections and 535  
 536 no learned lateral connectivity, with lateral communication 537  
 538 restricted to the layer normalization operation. We reason that 539  
 540 this model was capable of producing topographic organization 541  
 542 in a way similar to the Self-Organizing Map (SOM) (34) and 543  
 544 other algorithms applied to early visual cortex topographic 545  
 546 organization (26, 28). Each of these algorithms implements 547  
 548 a form of local cooperation alongside broader competition. 549  
 550 Specifically, in the SOM, global competition is implemented 551  
 552 by selecting a winning unit on each trial, and suppressing the 553  
 554 responses of all other units, and local cooperation is mediated 555  
 556 through Hebbian learning scaled by a Gaussian neighborhood 557  
 558 around the winning unit. In ITN models including our feed- 559  
 560 forward variant, the local excitatory feedforward connections 561  
 562 implement a form of local cooperation, ensuring that neigh- 563  
 564



539 boring units are positively correlated; the layer normalization  
540 operation then implements a global competition by attempting  
541 to convert the distribution of pre-activations to a standard  
542 normal distribution, which leads to sparser activity follow-  
543 ing rectification (the degree of which can be controlled by  
544 each unit’s bias term), and ensures that units represent dif-  
545 ferent aspects of the feature space. Thus, layer normalization  
546 implements both competition and interactivity that, when  
547 combined with the local representational cooperation induced  
548 by local excitatory feedforward connections, leads to a smooth  
549 topographic organization whereby the unit feature tuning is  
550 systematically more similar for nearby units than for farther  
551 units. In recurrent ITN models, the learned lateral connec-  
552 tions can adapt this competition and interactivity, allowing  
553 for increased performance (Figure 5).

554 Despite some conceptual similarities, there are several ad-  
555 vantages to variants of the ITN architecture relative to SOMs  
556 and other previous topographic mapping algorithms. The first  
557 is that ITNs are naturally hierarchical, allowing for multiple  
558 interacting levels of topographically organized representations,  
559 rather than assuming a single feature space to be arranged in  
560 a single topographic map. This allows them to explain the  
561 presence of multiple domain-selective regions arranged in a  
562 stream from earlier to later parts of IT (1, 3, 66, 67). Second,  
563 and relatedly, the connectivity constraints of the ITN can  
564 be incorporated into generic task-optimized neural networks,  
565 without requiring separate Hebbian updates to topographi-  
566 cally organize the feature space following development of the  
567 feature space as in the SOM. Lastly, the ITN framework is  
568 extremely flexible, allowing for future research to examine dif-  
569 ferent encoders, different IT architectures and topologies, and  
570 different task training environments and readout mechanisms.  
571 This makes the ITN an attractive approach for future research  
572 examining topographic organization in the visual system.

573 One limitation of our current work is that it only addresses  
574 the topographic organization of high-level representations,  
575 since the connectivity constraints were not applied within the  
576 convolutional layers of the encoder network that was used to  
577 model early and mid-level vision. In deep learning architec-  
578 tures, convolutions are a crucial aspect of achieving good task  
579 performance, whereas local connectivity suffers from a relative  
580 lack of inductive bias, thereby requiring more parameters and  
581 longer training time to learn similar features at different visual  
582 field locations. However, this is a particular challenge for the  
583 ITN framework that also points to a critical limitation of con-  
584 volutional architectures as a model of the brain. Attempting  
585 to model topographic organization in convolutional layers over  
586 both retinotopic location and stimulus features—well known  
587 organizing principles of early visual cortex—would necessitate  
588 that each channel have potentially different connections with  
589 other channels across different retinotopic positions, violating  
590 the convolution. In the brain, feature tuning is not actually  
591 uniform across the visual field (68). Thus, relaxing the convolu-  
592 tion assumption has merits for advancing visual computational  
593 neuroscience, and would enable more detailed connectivity-  
594 based topographic modeling of early and mid-level visual areas,  
595 an important line of work that deserves future attention. Fully  
596 connected visual “Transformer” layers using multiplicative  
597 attentional interactions (69, 70) may prove to be a promising  
598 architecture in which to examine topographic organization  
599 using the ITN framework, as these architectures have recently

600 been shown to reach high performance without convolutions.

601 The work presented here makes important progress in mod-  
602 eling, both quantitatively and qualitatively, the factors un-  
603 derlying visual cortical development throughout the visual  
604 hierarchy. Here, we focused on constraints local to the IT  
605 circuit. However, a currently unexplored question in our frame-  
606 work is why and how regions emerge in consistent locations  
607 across individuals of a given primate species (3, 17, 46, 71, 72).  
608 We hypothesize that modeling long-range connectivity-based  
609 constraints with regions external to IT (e.g., 44, 45) (see also  
610 73), along with adapting the ITN architecture to contain two  
611 hemispheres, will give rise to reliable localization of model  
612 cortical areas based on their connectivity with upstream and  
613 downstream areas. In particular, the retinotopic organization  
614 of upstream early visual cortical areas is thought to encourage  
615 foveally-biased cortex to support face representations, and  
616 peripherally-biased cortex to support scene representations  
617 (45, 74). Moreover, innate connectivity biases with down-  
618 stream nonvisual areas is thought to play a further role in  
619 shaping the global organization of domain-selective areas in  
620 IT (45, 75–79). These biases, such as left-hemispheric lan-  
621 guage biases, and other more fine-grained patterning of con-  
622 nections with domain-selective downstream areas (i.e., socially-  
623 responsive areas for faces, memory areas for scenes, motor  
624 areas for manipulable objects) should be explored in future  
625 work to better understand IT organization both within and  
626 between hemispheres. Based on previous work (43–45), we  
627 fully expect graded connectivity to bias the resulting locations  
628 of domain-selective regions. However, based on the results  
629 here, we argue that such long-range connectivity is not a nec-  
630 essary condition for topographic domain-selectivity; rather,  
631 the pressure for low wiring cost solutions to hierarchical visual  
632 computation within IT appears to be sufficient to drive such  
633 organization.

## 634 Materials and Methods

635 **The Interactive Topographic Network.** Here, we introduce the Inter-  
636 active Topographic Network (ITN), a framework for computational  
637 modeling of high-level visual cortex, under specific biological  
638 constraints and in the service of specific task demands. ITN operates  
639 according to a set of principles which build upon previous work (45),  
640 and can be divided into two components: an *encoder* that approx-  
641 imates early visual cortex, and *interactive topography* (IT) layers  
642 that approximate inferotemporal cortex. The goal of the encoder is  
643 to extract general visual features which describe the visual world  
644 along dimensions that support a broad range of downstream readout  
645 tasks. However, our main modeling focus is on IT, which consists  
646 of a series of pairs of recurrent layers that are subject to biological  
647 constraints. For computational simplicity, such constraints are not  
648 modeled in the encoder, although future work that incorporated  
649 similar constraints could be used to model topographic organization  
650 throughout the visual hierarchy.

651 **Encoder architecture and training.** We used a ResNet-50 (80) encoder  
652 to allow the ITN to extract deep and predictive features of the  
653 trained inputs. The encoder is pre-trained on equal sized subsets  
654 of faces, objects, and scenes from the VGGFace2 (81), ImageNet  
655 (82), and Places365 (83) datasets, respectively, matched in terms  
656 of total training images. We reused the same subsets of faces and  
657 objects as in (84), and an additional scene domain was constructed  
658 to match the other two domains in total images. An initial learning  
659 rate of 0.01 was used, and this learning rate was decayed 5 times  
660 by a factor of 10 upon plateau of the validation error; after the 5th  
661 learning rate decay, the next validation error plateau determined  
662 the end of training. Stochastic gradient descent with momentum

663 ( $\rho = 0.9$ ) and  $l2$  weight decay ( $\lambda = 0.0001$ ) was used, with batch  
664 size of 256 on a single GPU.

665 **Recurrent neural network formulation of IT.** Our model of IT extends  
666 the standard discrete-time Recurrent Neural Network (RNN) for-  
667 mulation common in computational neuroscience (e.g., 85). We  
668 begin with the continuous-time dynamics of units in an RNN layer,  
669 where  $\mathbf{x}^{(a)}$  is the vector of pre-activation activities in area  $a$  of IT,  
670  $\mathbf{r}^{(a)}$  is the vector of post-activation activities in area  $a$ ,  $\mathbf{b}^{(a)}$  is the  
671 vector of baseline activities in area  $a$ ,  $\tau$  is the scalar neuronal time  
672 constant, and  $W^{(a,b)}$  is the matrix of weights from area  $a$  to area  $b$ :

$$\tau \frac{d\mathbf{x}_t^{(a)}}{dt} = -\mathbf{x}_t^{(a)} + W^{(a,a)}\mathbf{r}_t^{(a)} + W^{(a-1,a)}\mathbf{r}_t^{(a-1)} + \mathbf{b}^{(a)} \quad [1]$$

673 where the activation function  $\mathbf{r}_t^{(a)} = [\mathbf{x}_t^{(a)}]_+$  is positive rectification,  
674 also called a Rectified Linear Unit (ReLU). Applying the Euler  
675 method to integrate this first-order ordinary differential equation,  
676 with time step size  $\Delta t$ , and substituting  $\alpha = \frac{\Delta t}{\tau}$ , yields the discrete  
677 time update:

$$\mathbf{x}_t^{(a)} = (1 - \alpha)\mathbf{x}_{t-1}^{(a)} + \alpha \left( W^{(a,a)}\mathbf{r}_{t-1}^{(a)} + W^{(a-1,a)}\mathbf{r}_{t-1}^{(a-1)} + \mathbf{b}^{(a)} \right) \quad [2]$$

678 Note that this formulation differs from the standard machine  
679 learning implementation of RNNs, which can be derived as a special  
680 case where  $\Delta t = \tau$  or  $\alpha = 1$ , in which the time constant is set such  
681 that the previous activity of a neuron decays exactly to zero in the  
682 time between updates, such that it can be set to 0 in the update  
683 equation.

684 When training models with separate excitatory and inhibitory  
685 units, we noted that training could be extremely unstable and  
686 required some mechanism for achieving stability. To this end, we  
687 adopted layer normalization (86), without the trainable scaling  
688 parameter that is sometimes used (see 86, for more details). Where  
689  $\mu(\mathbf{x})$  is the mean of  $\mathbf{x}$ , and  $\sigma(\mathbf{x})$  is the standard deviation of  $\mathbf{x}$ , and  $\mathbf{b}$   
690 is the learned bias term (moved outside of the layer normalization),  
691 the layer-normalized activities are given as:

$$\mathbf{z}_t = \frac{\mathbf{x}_t - \mu(\mathbf{x}_t)}{\sigma(\mathbf{x}_t)} + \mathbf{b}$$

$$\mathbf{r}_t = [\mathbf{z}_t]_+$$

692 Incorporating layer normalization into our update equation yields  
693 the final update equation:

$$\mathbf{x}_t^{(a)} = (1 - \alpha)\mathbf{z}_{t-1}^{(a)} + \alpha \left( W^{(a,a)}\mathbf{r}_{t-1}^{(a)} + W^{(a-1,a)}\mathbf{r}_{t-1}^{(a-1)} \right) \quad [3]$$

694 **Extending the standard RNN framework with biological constraints.**  
695 Here, we outline the major biological constraints implemented in  
696 this work.

697 **Spatial organization.** An essential aspect of an ITN model is that  
698 each IT layer has a spatial organization. We chose to model layers as  
699 square grids, with each layer of the hierarchy of equal size (typically,  
700 a grid size length of 32, corresponding to a layer of 1024 units). We  
701 normalize the coordinates to lie in the range  $[0,1]$ . Each unit thus  
702 has a unique  $(x, y)$  coordinate which will be used to determine the  
703 distance-dependent network topology. In general, the specific choices  
704 about map spatial arrangement are not critical to the predictions  
705 of the model, but they can potentially be manipulated in certain  
706 ways in the service of other theoretical goals.

707 **Spatial connectivity costs.** We impose distance-dependent con-  
708 straints on connectivity through a cost on longer connections  
709 throughout training. This basic formulation of the loss was in-  
710 troduced by (43) as a way to induce spatially organized task special-  
711 ization, and was shown to do so in a simple neural network model  
712 trained on small-scale tasks. To our knowledge, no other research  
713 has examined this loss in modern deep learning architectures trained  
714 on natural images. We use a simple modification of the original loss  
715 function, using the squared Euclidean distance  $(\mathcal{D}_{i,j})^2 = \|\mathbf{r}_i - \mathbf{r}_j\|_2^2$   
716 (in place of  $(\mathcal{D}_{i,j})^{10} = \|\mathbf{r}_i - \mathbf{r}_j\|_{10}^{10}$  distance (43)). By using the  
717 squared distance, we penalize longer connections disproportionately

718 compared to shorter connections. The spatial loss on connections  
719 between areas  $a$  and  $b$ ,  $\mathcal{L}_w^{(a,b)}$ , is given by:

$$\mathcal{L}_w^{(a,b)} = \sum_{i,j} \frac{(\mathcal{D}_{ij}^{(a,b)})^2 (W_{ij}^{(a,b)})^2}{1 + (W_{ij}^{(a,b)})^2} \quad [4]$$

720 The total spatial loss is the sum of the area-to-area spatial losses  
721  $\mathcal{L}_w = \sum_{a,b} \mathcal{L}_w^{(a,b)}$ , and is added to the task-based loss as  $\mathcal{L} =$   
722  $\mathcal{L}_t + \lambda_w \mathcal{L}_w$ , on which gradient descent is performed.

723 **Connection noise.** To approximate axon-specific variability in in-  
724 stantaneous firing rate (87), We apply multiplicative noise on the  
725 individual connections between neurons which is uniform over dis-  
726 tance and layers. In practice, we find that connection noise helps  
727 to regularize the activations in the network, encouraging a more  
728 distributed representation. Noise is sampled independently from  
729 a Gaussian distribution  $\mathcal{N}$  centered at 0 with variance  $\sigma^2$  at each  
730 time step of each trial, and is squashed by a sigmoidal function  
731  $S(x) = \frac{2}{1+e^{-x}}$ , ensuring that the sign of each weight is not changed  
732 and each magnitude does not change by more than 100%. Thus,  
733 the noisy weight matrix  $W_n^{(a,b)}$  from area  $a$  to area  $b$  on a given  
734 trial and time step is:

$$W_n^{(a,b)} = S(\mathcal{N}(0, \sigma)) * W^{(a,b)} \quad [5]$$

735 **Sign-based restrictions on neuronal connectivity.** As has been dis-  
736 cussed in prior computational work (85), standard neural networks  
737 gloss over a key detail of neuronal morphology—that single neurons  
738 obey Dale’s Law, whereby all of their outgoing connections are either  
739 excitatory or inhibitory (ignoring modulatory neurons and other  
740 special, rare cases). We employ this principle within our framework  
741 by replacing the single sheet of unconstrained neurons with parallel  
742 sheets of excitatory (E) and inhibitory (I) neurons. We follow the  
743 method of (85) to enforce the sign of connectivity in our neuronal  
744 populations. The second sign-based restriction we implement is  
745 that between-area interactions are carried out predominantly by  
746 excitatory pyramidal neurons. Thus, we restrict between-area feed-  
747 forward connectivity to originate from the excitatory neurons only.  
748 Both E and I neurons receive feedforward inputs.

749 **Task demands.** Task-driven computational models learn represen-  
750 tations that better account for neural responses in visual cortex  
751 than models which are designed by hand (24, 25, 49). More recent  
752 work has shown that a supervised version of task-driven learning is  
753 not essential, with semi-supervised contrastive learning algorithms  
754 performing very close to the supervised state-of-the-art in neural  
755 prediction (88). For simplicity and as a first step, we use supervised  
756 learning: Given a set of categories, the network is tasked with  
757 classifying images into one of these categories. The cross-entropy  
758 loss is used as an objective function, optimized using stochastic  
759 gradient descent with weight decay and momentum. We expect  
760 our general findings to hold for any learning algorithm that places  
761 comparable demands on high-level representation learning.

762 Visual systems often have to perform multiple tasks, where the  
763 specific organization of tasks is not known ahead of time. There-  
764 fore, a pre-specified task segregation (c.f. 89) is not possible. By  
765 specifying only a domain-general architecture, and optimizing to  
766 performance over multiple tasks, ITN models can discover the task-  
767 specific organization that maximizes task performance in the context  
768 of its task-general architectural constraints. Here, we simulate the  
769 requirement of performing three somewhat different visual tasks  
770 from common inputs, using common resources. The first task is face  
771 identification, for which we use VGGFace2 (81). The second task is  
772 object and animal recognition (hereafter just referred to as objects),  
773 for which we use the ImageNet dataset (82). The third task is scene  
774 recognition, for which we use the Place365 dataset (83). These three  
775 tasks constitute three separate “domains,” each containing several  
776 categories which the network must learn to discriminate between.  
777 However, the network has no prior knowledge of the separability of  
778 these domains, and they are fully interleaved during training.

779 **IT architecture and training.** The main ITN model consists of 3 IT  
780 layers (pIT, cIT, aIT) with separate E and I populations, and  
781 feedforward connections sent only by E units. To facilitate training  
782 many models with fewer computational demands, the model is  
783 trained using a fixed pre-trained ResNet-50 encoder on smaller  
784 subsets of faces, objects, and scenes. Specifically, we created image  
785 subsets equal to the size of the popular CIFAR-100 dataset but at  
786 higher image resolution, containing 100 categories each with 500  
787 training images and 100 validation images, resized to 112x112 pixels.  
788 Thus, the combined dataset contained 300 categories with 150,000  
789 training images and 30,000 validation images. The same learning  
790 rate schedule as used for training the encoder was used. Stochastic  
791 gradient descent with momentum ( $\rho = 0.9$ ) was used, with batch  
792 size of 1024 on a single GPU. We used spatial regularization with  
793  $\lambda_w = 0.05$ , without additional weight decay on IT connections.

794 **IT model variants.** To better understand the factors that contribute  
795 to the development of topographic organization, we examine a variety  
796 of IT model variants containing different subsets of implemented  
797 constraints. Some of these models do not use separate populations  
798 of E and I units, but still restrict feedforward connectivity to be excitatory.  
799 In this case, we simply restrict the feedforward weights to be positive,  
800 despite the same neuron having both positive and negative lateral  
801 connections. In another variant, we remove learned lateral  
802 connections entirely. This model is trained for a single time step,  
803 and the only recurrent computation is that of a single pass of layer  
804 normalization. Lastly, we explore a range of spatial regularization  
805 strengths.

806 **Analyses of trained models.** After training, the responses in IT layers  
807 are probed to investigate emergent task specialization and its  
808 topographic organization. We use three main approaches.

809 **Mass univariate analyses.** The first analytic approach is the simple  
810 mass-univariate approach, in which each unit is analyzed separately  
811 for its mean response to each stimulus domain (objects, faces,  
812 scenes), using untrained validation images from the same categories  
813 used in training. In addition to computing the mean response to  
814 each domain, we compute *selectivity*, a ubiquitous metric used in  
815 neuroscience, to analyze how responsive a unit is to one domain  
816 compared to all others. We compare the responses of each domain  
817 versus the others using a two-tailed *t*-test, and given the test statistic  
818 *t*, the significance value *p* of the test, and the sign of the test statistic  
819  $s = \text{sign}(t)$ , we compute the selectivity as  $-s \log(p)$ .

820 **Searchlight decoding analysis.** The second analysis approach we use  
821 is the multivariate searchlight analysis commonly used in fMRI (51),  
822 in which a pool of units are selected in a (circular) spatial window  
823 around each unit, and the accuracy for discriminating between  
824 different categories (e.g., hammer vs. screw-driver) in each domain  
825 (e.g., objects) is computed using the activations of only that pool of  
826 units; the mean accuracy value is assigned to the center unit, and  
827 the process is repeated for all units.

828 **Lesion analysis.** To assess the causal role of certain units in the  
829 performance of specific tasks, we adopt a lesioning approach in  
830 which the activities of lesioned units are set to 0 throughout perception.  
831 This effectively removes them from processing, allowing  
832 the network's dynamics to unfold independently of these units. The  
833 effect of a lesion is measured by computing the accuracy following  
834 the lesion and relating that to the baseline accuracy.

835 The first type of lesion we perform is a spatial or *focal* lesion  
836 in which a circular neighborhood of size  $p * n$  units is selected,  
837 where *p* is the fraction of units selected and *n* is the total number  
838 of units in the area where the lesion is performed. The lesion is  
839 centered on a unit  $u_{i,j}$  either randomly or according to the peak  
840 of a specific metric such as selectivity. In the main analyses, we  
841 attempt to lesion spatial neighborhoods corresponding to regions  
842 of high domain selectivity. To do so, we take the selectivity map,  
843 perform spatial smoothing, and select the unit *u* of peak smoothed  
844 selectivity. We then systematically vary *p* while keeping *u* fixed to  
845 assess the causal role of increasingly large regions centered on the  
846 peak of smoothed selectivity.

847 The second type of lesion sorts units according to a given *selectivity*  
848 metric irrespective of their spatial location. In this analysis,  
849 the  $p * n$  most selective units are chosen for a given lesion. This is

850 done separately for the selectivity of each domain, as in the focal  
851 lesions. When the topography is smooth and the regions approxi-  
852 mately circular, the selectivity-ordered and focal lesions yield similar  
853 results. However, to the extent that the topography is not perfectly  
854 smooth or circular, the selectivity-ordered lesion may knock-out a  
855 more relevant set of units for a given task.

856 **Distance-dependent response correlation.** We calculate the correlations  
857 of the responses of all pairs of units as a function of distance  
858 between them. Response correlation is computed for a given time  
859 step over a large number of images, either from all domains, or from  
860 each domain separately. We additionally compute a scalar metric  
861 of this analysis by taking the Spearman correlation of response  
862 correlation and distance. This metric can be easily visualized over  
863 many time steps, layers, cell types, models, etc.

864 **Analyzing spatial costs of trained networks.** To understand the  
865 wiring cost of certain trained models, we analyze the spatial cost of  
866 a network, as given by Equation 4, as a function of architectural  
867 parameters such as the spatial regularization strength  $\lambda_w$ . In one  
868 analysis, we analyze only the feedforward spatial cost, which simply  
869 requires summing spatial costs over pairs of areas *a* and *b* where  
870  $a \neq b$ . Similarly, to analyze only the recurrent spatial cost, we can  
871 sum spatial cost over pairs of areas *a* and *b* where  $a = b$ .

872 **Unweighted spatial cost of sparsified networks.** While wiring cost in  
873 an artificial neural network should depend to some extent on the  
874 strength of connections—stronger connections may require greater  
875 myelination, and strong connections in an artificial neural network  
876 may correspond to a larger number of connections in a biological  
877 neural network—there is another notion of wiring cost whereby  
878 it depends only on whether or not two neurons are connected.  
879 This notion of wiring costs has been commonly applied to the  
880 study of cortical areal layout and early visual cortical maps (e.g.  
881 29, 58, 59, 90). Moreover, the analysis of binary connectivity in  
882 thresholded networks is also common in graph-theoretic analysis of  
883 brain data (91). To analyze this notion of wiring costs, we pruned  
884 our trained models to a desired connection sparsity level *s*, setting to  
885 0 the  $n * m * s$  connections with the smallest magnitude, where *n* and  
886 *m* are the number of units in areas *a* and *b*. Sparsity was enforced  
887 globally within IT and from IT to readout, rather than individually  
888 for each set of connections. We then analyzed an unweighted wiring  
889 cost  $\mathcal{L}_{w,u}^{(a,b)}$  that computes the mean of squared Euclidean distance  
890 values between connected units *i* and *j* in areas *a* and *b*, given that  
891  $(a, b)$  are in the set of connected areas *C*:

$$\mathcal{L}_{w,u}^{(a,b)} = \frac{1}{(1-s) * n * m} \sum_{i,j} \left( \mathcal{D}_{ij}^{(a,b)} \right)^2 \left( W_{ij}^{(a,b)} \neq 0 \right) \quad [6]$$

892 **ACKNOWLEDGMENTS.** The authors thank Michael J. Tarr,  
893 Leila Wehbe, Vlad Ayzenberg, Jacob Prince and the VisCog research  
894 group at Carnegie Mellon University for helpful discussions and  
895 comments on this work. N.M.B. thanks Rosemary A. Cowell for  
896 early discussions that helped to conceive of the work.

- 897 1. N Kanwisher, J McDermott, MM Chun, The Fusiform Face Area: A Module in Human Ex-  
898 trastriate Cortex Specialized for Face Perception. *J. Neurosci.* **17**, 4302–4311 (1997).
- 899 2. I Gauthier, et al., The fusiform “face area” is part of a network that processes faces at the  
900 individual level. *J. cognitive neuroscience* **12**, 495–504 (2000).
- 901 3. K Grill-Spector, KS Weiner, K Kay, J Gomez, The Functional Neuroanatomy of Human Face  
902 Perception. *Annu. Rev. Vis. Sci.* **3**, 163:197 (2017).
- 903 4. K Grill-Spector, T Kushnir, T Hendler, R Malach, The dynamics of object-selective activation  
904 correlate with recognition performance in humans. *Nat. Neurosci.* **3**, 837–843 (2000).
- 905 5. GK Aguirre, E Zarahn, M D’Esposito, An area within human ventral cortex sensitive to “Build-  
906 ing” stimuli: Evidence and implications. *Neuron* **21**, 373–383 (1998).
- 907 6. R Epstein, N Kanwisher, A cortical representation of the local visual environment. *Nature*  
908 **392**, 598–601 (1998).
- 909 7. BD McCandliss, L Cohen, S Dehaene, The visual word form area: Expertise for reading in  
910 the fusiform gyrus. *Trends Cogn. Sci.* **7**, 293–299 (2003).
- 911 8. DY Tsao, WA Freiwald, TA Knutsen, JB Mandeville, RBH Tootell, Faces and objects in  
912 macaque cerebral cortex. *Nat. Neurosci.* **6**, 989–995 (2003).
- 913 9. DY Tsao, WA Freiwald, RBH Tootell, MS Livingstone, A Cortical Region Consisting Entirely  
914 of Face-Selective Cells. *Science* **311**, 670–674 (2006).
- 915 10. WA Freiwald, DY Tsao, Functional Compartmentalization and Viewpoint Generalization  
916 Within the Macaque Face-Processing System. *Science* **330**, 845–851 (2010).
- 917 11. T Sato, et al., Object representation in inferior temporal cortex is organized hierarchically in a  
918 mosaic-like structure. *J. Neurosci.* **33**, 16642–16656 (2013).

- 919 12. K Tanaka, Inferotemporal Cortex and Object Vision. *Annu. Rev. Neurosci.* **19**, 109–139  
920 (1996).
- 921 13. K Tanaka, Columns for Complex Visual Object Features in the Inferotemporal Cortex : Clus-  
922 tering of Cells with Similar but Slightly Different Stimulus Selectivities. *Cereb. Cortex* **13**,  
923 90–99 (2003).
- 924 14. T Konkle, A Oliva, A Real-World Size Organization of Object Responses in Occipitotemporal  
925 Cortex. *Neuron* **74**, 1114–1124 (2012).
- 926 15. T Konkle, A Caramazza, Tripartite Organization of the Ventral Stream by Animacy and Object  
927 Size. *J. Neurosci.* **33**, 10235–10242 (2013).
- 928 16. B Long, CP Yu, T Konkle, Mid-level visual features underlie the high-level categorical organi-  
929 zation of the ventral stream. *Proc. Natl. Acad. Sci.* **115**, E9015–E9024 (2018).
- 930 17. MJ Arcaro, MS Livingstone, A hierarchical , retinotopic proto- organization of the primate  
931 visual system at birth. *eLife*, 1–24 (2017).
- 932 18. S Dehaene, L Cohen, J Morais, R Kolinsky, Illiterate to literate: behavioural and cerebral  
933 changes induced by reading acquisition. *Nat. Rev. Neurosci.* **16**, 234–244 (2015).
- 934 19. M Carreiras, et al., An anatomical signature for literacy. *Nature* **461**, 983–986 (2009).
- 935 20. S Dehaene, L Cohen, Cultural Recycling of Cortical Maps. *Neuron* **56**, 384–398 (2007).
- 936 21. MJ Arcaro, PF Schade, MS Livingstone, Universal Mechanisms and the Development of the  
937 Face Network: What You See Is What You Get. *Annu. Rev. Vis. Sci.* **5**, 341–372 (2019).
- 938 22. BA Olshausen, DJ Field, Emergence of simple-cell receptive field properties by learning a  
939 sparse code for natural images. *Nature* **381**, 607–609 (1996).
- 940 23. BA Olshausen, DJ Field, Sparse coding with an overcomplete basis set: A strategy employed  
941 by V1? *Vis. Res.* **37**, 3311–3325 (1997).
- 942 24. DLK Yamins, et al., Performance-optimized hierarchical models predict neural responses in  
943 higher visual cortex. *Proc. Natl. Acad. Sci. United States Am.* **111**, 8619–24 (2014).
- 944 25. SM Khaligh-Razavi, N Kriegeskorte, Deep Supervised , but Not Unsupervised , Models May  
945 Explain IT Cortical Representation. *PLoS Comput. Biol.* **10** (2014).
- 946 26. C von der Malsburg, Self-organization of orientation sensitive cells in the striate cortex. *Ky-  
947 bernetik*, 85–100 (1973).
- 948 27. R Linsker, From basic network principles to neural architecture: Emergence of orientation  
949 columns. *Proc. Natl. Acad. Sci. USA*, 5 (1986).
- 950 28. K Miller, J Keller, M Stryker, Ocular dominance column development: Analysis and simulation.  
951 *Science* **245**, 605–615 (1989).
- 952 29. R Durbin, G Mitchison, A dimension reduction framework for understanding cortical maps.  
953 *Nature* **343**, 644–647 (1990).
- 954 30. K Obermayer, H Ritter, K Schulten, A principle for the formation of the spatial structure of  
955 cortical feature maps. *Proc. Nad. Acad. Sci.* **87**, 8345–8349 (1990).
- 956 31. GJ Goodhill, DJ Willshaw, Application of the elastic net algorithm to the formation of ocular  
957 dominance stripes. *Network: Comput. Neural Syst.* **1**, 41–59 (1990).
- 958 32. GJ Goodhill, Topography and ocular dominance: A model exploring positive correlations. *Biol.  
959 Cybern.* **69**, 109–118 (1993).
- 960 33. NV Swindale, The development of topography in the visual cortex: A review of models. *Net-  
961 work: Comput. Neural Syst.* **7**, 161–247 (1996).
- 962 34. T Kohonen, Self-organized formation of topologically correct feature maps. *Biol. Cybern.* **43**,  
963 59–69 (1982).
- 964 35. RA Cowell, GW Cottrell, What Evidence Supports Special Processing for Faces? A Caution-  
965 ary Tale for fMRI Interpretation. *J. Cogn. Neurosci.* **25**, 1777–1793 (2013).
- 966 36. B Rossion, J Taubert, What can we learn about human individual face recognition from ex-  
967 perimental studies in monkeys? *Vis. Res.* **157**, 142–158 (2019).
- 968 37. MH Tong, CA Joyce, GW Cottrell, Why is the fusiform face area recruited for novel categories  
969 of expertise ? A neurocomputational investigation. *Brain Res.*, 14–24 (2008).
- 970 38. GW Cottrell, JH Hsiao, Neurocomputational Models of Face Processing. *Oxf. Handb. Face  
971 Percept.* (2011).
- 972 39. P Grimaldi, KS Saleem, D Tsao, Anatomical Connections of the Functionally Defined “ Face  
973 Patches ” in the Macaque Monkey. *Neuron* **90**, 1325–1342 (2016).
- 974 40. JJ DiCarlo, D Zoccolan, NC Rust, How does the brain solve visual object recognition? *Neuron*  
975 **73**, 415–434 (2012).
- 976 41. J Sirosh, R Miikkulainen, Topographic Receptive Fields and Patterned Lateral Interaction in a  
977 Self-Organizing Model of the Primary Visual Cortex. *Neural Comput.* **9**, 577–594 (1997).
- 978 42. R Miikkulainen, JA Bednar, Y Choe, J Sirosh, *Computational Maps in the Visual Cortex.*  
979 (2006).
- 980 43. RA Jacobs, MI Jordan, Computational consequences of a bias toward short connections. *J.  
981 Cogn. Neurosci.* **4**, 323–336 (1992).
- 982 44. DC Plaut, Graded modality-specific specialisation in semantics: A computational account of  
983 optic aphasia. *Cogn. Neuropsychol.* **19**, 603–639 (2002).
- 984 45. DC Plaut, M Behrmann, Complementary neural representations for faces and words: A com-  
985 putational exploration. *Cogn. Neuropsychol.* **28**, 251–275 (2011).
- 986 46. M Behrmann, DC Plaut, Distributed circuits, not circumscribed centers, mediate visual recog-  
987 nition. *Trends Cogn. Sci.* **17**, 210–219 (2013).
- 988 47. M Behrmann, DC Plaut, A vision of graded hemispheric specialization. *Annals New York  
989 Acad. Sci.* **1359**, 30–46 (2015).
- 990 48. M Behrmann, DC Plaut, Hemispheric Organization for Visual Object Recognition: A Theoret-  
991 ical Account and Empirical Evidence. *Perception* **49**, 373–404 (2020).
- 992 49. DLK Yamins, JJ DiCarlo, Eight open questions in the computational modeling of higher sen-  
993 sory cortex. *Curr. Opin. Neurobiol.* **37**, 114–120 (2016).
- 994 50. H Lee, et al., Topographic deep artificial neural networks reproduce the hallmarks of the  
995 primate inferior temporal cortex face processing network, (Neuroscience), Preprint (2020).
- 996 51. N Kriegeskorte, M Mur, P Bandettini, Representational similarity analysis - connecting the  
997 branches of systems neuroscience. *Front. systems neuroscience* **2**, 4 (2008).
- 998 52. DH Hubel, TN Wiesel, Anatomical Demonstration of Columns in the Monkey Striate Cortex.  
999 *Nature* **221**, 747–750 (1969).
- 1000 53. MJ Farah, *Visual Agnosia: Disorders of Object Recognition and What They Tell Us About  
1001 Normal Vision.* (MIT Press), (1990).
- 1002 54. M Moscovitch, G Winocur, M Behrmann, What Is Special about Face Recognition? Nine-  
teen Experiments on a Person with Visual Object Agnosia and Dyslexia but Normal Face  
Recognition. *J. Cogn. Neurosci.* **9**, 555–604 (1997).
55. J Geskin, M Behrmann, Congenital prosopagnosia without object agnosia? A literature re-  
view. *Cogn. Neuropsychol.* **3294**, 1–51 (2017).
56. J Fodor, *The Modularity of Mind: An Essay on Faculty Psychology.* (The MIT Press, Cam-  
bridge, MA), (1983).
57. NJ Majaj, H Hong, EA Solomon, JJ DiCarlo, Simple Learned Weighted Sums of Inferior Tem-  
poral Neuronal Firing Rates Accurately Predict Human Core Object Recognition Performance.  
*J. Neurosci.* **35**, 13402–13418 (2015).
58. AA Koulakov, DB Chklovskii, Orientation Preference Patterns in Mammalian Visual Cortex: A  
Wire Length Minimization Approach. *Neuron* **29**, 519–527 (2001).
59. D Chklovskii, Synaptic Connectivity and Neuronal Morphology Two Sides of the Same Coin.  
*Neuron* **43**, 609–617 (2004).
60. JL McClelland, DE Rumelhart, PR Group, et al., *Parallel Distributed Processing.* (MIT press  
Cambridge, MA) Vol. 2, (1986).
61. JL McClelland, et al., Letting structure emerge: Connectionist and dynamical systems ap-  
proaches to cognition. *Trends Cogn. Sci.* **14**, 348–356 (2010).
62. D Linsley, J Kim, V Veerabadrn, C Windolf, T Serre, Learning long-range spatial depen-  
dencies with horizontal gated recurrent units in *Advances in Neural Information Processing  
Systems*. Vol. 2018-Decem, pp. 152–164 (2018).
63. D Linsley, AK Ashok, LN Govindarajan, R Liu, T Serre, Stable and expressive recurrent vision  
models. *arXiv:2005.11362 [cs]* (2020).
64. A Nayeibi, et al., Task-Driven Convolutional Recurrent Models of the Visual System. *arXiv*,  
1–14 (2018).
65. J Kubilius, et al., CORnet: Modeling the Neural Mechanisms of Core Object Recognition.  
*bioRxiv*, 1–9 (2018).
66. I Gauthier, P Skudlarski, JC Gore, AW Anderson, Expertise for cars and birds recruits brain  
areas involved in face recognition. *Nat. Neurosci.* **3**, 191–197 (2000).
67. N Kriegeskorte, E Formisano, B Sorger, R Goebel, Individual faces elicit distinct response  
patterns in human anterior temporal cortex. *Proc. Natl. Acad. Sci. United States Am.* **104**,  
20600–5 (2007).
68. EH Silson, AWY Chan, RC Reynolds, DJ Kravitz, CI Baker, A retinotopic basis for the division  
of high-level scene processing between lateral and ventral human occipitotemporal cortex. *J.  
Neurosci.* **35**, 11921–11935 (2015).
69. A Vaswani, et al., Attention is all you need in *Advances in Neural Information Processing  
Systems*. Vol. 2017-Decem, pp. 5999–6009 (2017).
70. A Jaegle, et al., Perceiver: General perception with iterative attention (2021).
71. N Kanwisher, Functional specificity in the human brain: A window into the functional archite-  
cture of the mind. *Proc. Natl. Acad. Sci. United States Am.* **107**, 11163–11170 (2010).
72. K Srihasam, JL Vincent, MS Livingstone, Novel domain formation reveals proto-architecture  
in inferotemporal cortex. *17*, 1776–1783 (2014).
73. HF Song, H Kennedy, XJ Wang, Spatial embedding of structural similarity in the cerebral  
cortex. *Proc. Natl. Acad. Sci.* **111**, 16580–16585 (2014).
74. I Levy, U Hasson, G Avidan, T Hendler, R Malach, Center–periphery organization of human  
object areas. *Nat. neuroscience* **4**, 533–539 (2001).
75. CJ Price, JT Devlin, The interactive account of ventral occipitotemporal contributions to read-  
ing. *Trends cognitive sciences* **15**, 246–253 (2011).
76. ZM Saygin, et al., Anatomical connectivity patterns predict face selectivity in the fusiform  
gyrus. *Nat. Neurosci.* **15**, 321–327 (2012).
77. ZM Saygin, et al., Connectivity precedes function in the development of the visual word form  
area. *Nat. Neurosci.* **19**, 1250–1255 (2016).
78. BZ Mahon, A Caramazza, What drives the organization of object knowledge in the brain?  
*Trends Cogn. Sci.* **15**, 97–103 (2011).
79. LJ Powell, HL Kosakowski, R Saxe, Social Origins of Cortical Face Areas. *Trends cognitive  
sciences* **22**, 752–763 (2018).
80. K He, X Zhang, S Ren, J Sun, Deep residual learning for image recognition. *Proc. IEEE  
Comput. Soc. Conf. on Comput. Vis. Pattern Recognit.* **2016-Decem**, 770–778 (2016).
81. Q Cao, L Shen, W Xie, OM Parkhi, A Zisserman, VGGFace2: A dataset for recognising faces  
across pose and age in *International Conference on Automatic Face and Gesture Recogni-  
tion.* (2018).
82. J Deng, et al., ImageNet: A Large-Scale Hierarchical Image Database in *CVPR.* (IEEE), pp.  
248–255 (2009).
83. B Zhou, A Lapedriza, A Khosla, A Oliva, A Torralba, Places: A 10 Million Image Database  
for Scene Recognition. *IEEE Transactions on Pattern Analysis Mach. Intell.* **40**, 1452–1464  
(2018).
84. NM Blauch, M Behrmann, DC Plaut, Computational insights into human perceptual expertise  
for familiar and unfamiliar face recognition. *Cognition* **208** (2021).
85. HF Song, GR Yang, XJ Wang, Training Excitatory-Inhibitory Recurrent Neural Networks for  
Cognitive Tasks: A Simple and Flexible Framework. *PLOS Comput. Biol.* **12**, e1004792  
(2016).
86. JL Ba, JR Kiros, GE Hinton, Layer Normalization. *arXiv:1607.06450 [cs, stat]* (2016).
87. B Cipollini, G Cottrell, Uniquely human developmental timing may drive cerebral lateralization  
and interhemispheric collaboration in *Proceedings of the Cognitive Science Society*, 335(35).  
pp. 334–339 (2013).
88. C Zhuang, T She, A Andonian, MS Mark, D Yamins, Unsupervised Learning from Video with  
Deep Neural Embeddings. *arXiv:1905.11954 [cs]* (2020).
89. K Dobs, A Kell, I Palmer, M Cohen, N Kanwisher, Why Are Face and Object Processing  
Segregated in the Human Brain? Testing Computational Hypotheses with Deep Convolutional  
Neural Networks in *Cognitive Computational Neuroscience.* (Cognitive Computational  
Neuroscience), (2019).
90. G Mitchison, Neuronal branching patterns and the economy of cortical wiring. *Proc. Royal  
Soc. London. Ser. B: Biol. Sci.* **245**, 151–158 (1991).
91. E Bullmore, O Sporns, Complex brain networks: Graph theoretical analysis of structural and  
functional systems. *Nat. Rev. Neurosci.* **10**, 186–198 (2009).
